## Association between social determinants of health and cardiovascular and cancer mortality in cancer survivors: a nationally representative cohort study

Brief title: Deprivation and mortality in cancer survivors

Jeffrey Shi Kai Chan MBChB MPH FESC<sup>1</sup>, Danish Iltaf Satti MBBS<sup>1,2</sup>, Yat Long Anson Ching<sup>1</sup>, Quinncy Lee MPH DrPH<sup>1</sup>, Edward Christopher Dee MD<sup>3</sup>, Kenrick Ng MA MRCP PhD<sup>4</sup>, Oscar Hou-In Chou MBBS MSc<sup>1</sup>, Tong Liu MD PhD<sup>5</sup>, Gary Tse MD PhD FRCP FFPH FRCPath<sup>5,6,7#</sup>, Agnes Lai DN PhD<sup>6</sup>

<sup>1</sup> Cardio-Oncology Research Unit, Cardiovascular Analytics Group, PowerHealth Research Institute, Hong Kong, China

<sup>2</sup> Division of Cardiology, Johns Hopkins University School of Medicine, Baltimore, MD, USA

<sup>3</sup> Department of Radiation Oncology, Memorial Sloan Kettering Cancer Center, New York, NY, USA

<sup>4</sup> Department of Medical Oncology, Barts Cancer Centre, London, UK

<sup>5</sup> Tianjin Key Laboratory of Ionic-Molecular Function of Cardiovascular Disease, Department of Cardiology, Tianjin Institute of Cardiology, Second Hospital of Tianjin Medical University, Tianjin 300211, China

<sup>6</sup> School of Nursing and Health Studies, Hong Kong Metropolitan University, Hong Kong, China

<sup>7</sup> Kent and Medway Medical School, Canterbury, Kent, CT2 7NT, UK

# Correspondence to:

*Prof Agnes Lai*

School of Nursing and Health Studies, Hong Kong Metropolitan University, Hong Kong, China  
Tel: +852 3970 2917

E-mail: [ayklai@hkmu.edu.hk](mailto:ayklai@hkmu.edu.hk)

*Prof Gary Tse*

Tianjin Key Laboratory of Ionic-Molecular Function of Cardiovascular Disease, Department of Cardiology, Tianjin Institute of Cardiology, Second Hospital of Tianjin Medical University, Tianjin 300211, China

Kent and Medway Medical School, Canterbury, Kent, CT2 7NT, UK

School of Nursing and Health Studies, Hong Kong Metropolitan University, Hong Kong, China  
Tel: +852 5332 2823

E-mail: [gary.tse@kmms.ac.uk](mailto:gary.tse@kmms.ac.uk)

**Word count:** 750

**Funding:** This work is supported by a Research Impact Fund awarded to GT by the Hong Kong Metropolitan University (Project Reference No. RIF/2022/2.2).

**Conflict of interest:** ECD is funded in part through the Cancer Center Support Grant from the National Cancer Institute (P30 CA008748). All other authors report no conflict of interest.

**Ethics approval:** This study was exempt from ethics review due to the use of deidentified and publicly available data.

**Keywords:** disparities, outcomes, epidemiology, cancer survivorship

**NOTE:** This preprint reports new research that has not been certified by peer review and should not be used to guide clinical practice.

## Abstract

Although it is known that social deprivation is associated with higher risks of cardiovascular and cancer mortality in the general population, these associations may not be directly applicable to cancer survivors. Using data from the National Health Interview Survey (NHIS) 2013-2017 with follow-up till the end of 2019, we examined the associations between social determinants of health (SDOH) and the risk of all-cause, cardiovascular, and cancer mortality in cancer survivors, with separate modelling in individuals without cancer for comparison. Two Cox regression models were fitted for each outcome, the first being adjusted for demographics and the second being additionally adjusted for comorbidities and risk factors. Altogether, 37,882 individuals were analysed (representing a weighted population of 57,696,771), including 4179 cancer survivors and 33,703 individuals without cancer. Amongst cancer survivors, worse SDOH was associated with higher all-cause, cardiovascular, and cancer mortality when adjusted for demographics, which were attenuated but remained significant when further adjusted for comorbidities and risk factors. Amongst individuals without cancer, worse SDOH was associated with higher all-cause and cardiovascular mortality only when adjusted for demographics, but not when further adjusted for comorbidities and risk factors. These suggested that in cancer survivors, associations between SDOH and cardiovascular/cancer mortality may be driven by factors beyond comorbidities and risk factors, contrasting individuals without cancer in whom similar associations were probably driven mostly by comorbidities and risk factors.

Social determinants of health (SDOH) are increasingly recognized to substantially influence cardiovascular health in both the general population and cancer survivors.<sup>1,2</sup> A recent nationwide cross-sectional study of cancer survivors found strong associations between SDOH and cardiovascular risk factors.<sup>3</sup> Despite known associations between SDOH and cardiovascular/cancer mortality in the general population,<sup>4,5</sup> these associations have rarely been studied at the individual level amongst cancer survivors – given their cancer history and elevated cardiovascular risk,<sup>6</sup> relevant associations observed in the general population may not be applicable to them. Additionally, few studies have explored SDOH comprehensively using composite metrics. Therefore, we explored associations between SDOH and cardiovascular and cancer mortality in cancer survivors using a published composite SDOH score. Individuals without cancer were also studied to explore whether these associations varied with cancer survivorship.

Methods are detailed in the **Supplementary Methods**. We used data from the National Health Interview Survey (NHIS), an annual survey representative of the United States' non-institutionalized population linked to the National Death Index (NDI). Details of NHIS and data access were described elsewhere.<sup>3,7,8</sup> All data underlying this study are publicly available, rendering it exempt from ethics review.

Participants in NHIS 2013-2017 with mortality follow-up data were included. Those with missing SDOH/covariate data were excluded. All subjects were followed up from questionnaire administration to the end of 2019 or death, whichever earlier, as detailed elsewhere.<sup>9</sup> The outcomes of interest were all-cause mortality, cardiovascular mortality, and cancer mortality, ascertained through the NDI.

Cancer survivorship was self-reported<sup>3,7</sup>; per convention, individuals with only non-melanotic skin cancer were not considered cancer survivors.<sup>3</sup> SDOH was quantified using a

published, self-reported 38-point score, with higher scores indicating worse deprivation.<sup>3</sup> Covariates were ascertained from self-reported data as previously detailed.<sup>3,7</sup>

Survey-specific statistics with sampling weights were used to produce nationally representative estimates. Due to right-skewing, the composite SDOH score was analysed as standardized continuous variables after log-transformation (i.e.  $\ln[\text{SDOH}+1]$ ; abbreviated as ‘SDOH’ hereafter). As non-cardiovascular-non-cancer mortality (‘other-cause mortality’) constituted a competing event for cardiovascular and cancer mortality, a cause-specific approach was adopted, modelling associations between SDOH and the risks of each outcome and other-cause mortality using Cox regression. Associations in cancer survivors and individuals without cancer were modelled separately. Two models were pre-specified for each outcome based on clinical knowledge: model 1 was adjusted for demographics, while model 2 was adjusted for demographics, comorbidities, and risk factors.

A total of 37,882 individuals were analysed (**Supplementary Figure 1**), representing a population of 57,696,771 persons after applying sampling weights. These included 4179 cancer survivors (weighted  $N=5,762,493$ ) and 33,703 individuals without cancer (weighted  $N=51,934,278$ ). Their characteristics were summarized in **Supplementary Table 1**.

The analytic results were summarized in **Figure 1** and **Supplementary Table 2**. Amongst cancer survivors, worse SDOH was associated with higher all-cause, cardiovascular, and cancer mortality when adjusted for demographics, which were attenuated but remained significant when further adjusted for comorbidities and risk factors. No significant associations were found between SDOH and other-cause mortality.

Meanwhile, amongst individuals without cancer, worse SDOH was associated with higher all-cause and cardiovascular mortality only when adjusted for demographics, but not when further adjusted for comorbidities and risk factors. Worse SDOH was associated with

other-cause mortality in both multivariable models, whilst no associations between SDOH and cancer mortality were found.

This was one of the first studies specifically investigating associations between SDOH and cancer/cardiovascular mortality in cancer survivors. Our findings suggested that in cancer survivors, associations between SDOH and cardiovascular/cancer mortality may be driven by factors beyond comorbidities and risk factors which *per se* are associated with SDOH,<sup>3</sup> whilst much of the SDOH-cardiovascular mortality association in subjects without cancer was driven by comorbidities and risk factors. This highlighted the importance of addressing SDOH to improve cardiovascular/cancer outcomes in cancer survivors. Speculatively, disparity in multidisciplinary cardio-oncology care access may have driven our findings for cardiovascular mortality in cancer survivors, warranting relevant research. Whether the observed SDOH-mortality associations differ by race/ethnicity also warrants further research.<sup>1,10</sup>

Notwithstanding this study's nationally representative nature, it was limited by NHIS' self-reported nature, and the lack of individual data adjudication potentially predisposing to mortality data miscoding. Low event rates precluded subgroup/exploratory analyses, and the observational nature precluded causal inferences. Overall, our findings are hypothesis-generating, necessitating further confirmatory/mechanistic studies.

In conclusion, amongst cancer survivors, worse SDOH was associated with higher cardiovascular and cancer mortality, independent of demographics, comorbidities, and risk factors. Amongst individuals without cancer, SDOH was associated with cardiovascular mortality independent of demographics but not comorbidities and risk factors, with no association between SDOH and cancer mortality found. Further confirmatory/mechanistic studies are required.

**Funding:** This work is supported by a Research Impact Fund awarded to GT by the Hong Kong Metropolitan University (Project Reference No. RIF/2022/2.2).

**Conflict of interest:** ECD is funded in part through the Cancer Center Support Grant from the National Cancer Institute (P30 CA008748). All other authors report no conflict of interest.

## References

1. Chan JSK, Chan RNC, Lee YHA, et al. Cardiovascular health of patients with cancer: challenges abound. *Trends Cardiovasc Med*. 2024.  
doi:<https://doi.org/10.1016/j.tcm.2024.04.004>
2. Brandt EJ, Tobb K, Cambron JC, et al. Assessing and Addressing Social Determinants of Cardiovascular Health: JACC State-of-the-Art Review. *J Am Coll Cardiol*. 2023;81(14):1368-1385. doi:<https://doi.org/10.1016/j.jacc.2023.01.042>
3. Satti DI, Chan JSK, Dee EC, et al. Associations Between Social Determinants of Health and Cardiovascular Health of US Adult Cancer Survivors. *JACC CardioOncology*. 2024;0(0). doi:10.1016/j.jaccao.2023.07.010
4. Pinheiro LC, Reshetnyak E, Akinyemiju T, Phillips E, Safford MM. Social determinants of health and cancer mortality in the Reasons for Geographic and Racial Differences in Stroke (REGARDS) cohort study. *Cancer*. 2022;128(1):122-130.  
doi:10.1002/cncr.33894
5. Javed Z, Valero-Elizondo J, Cainzos-Achirica M, et al. Race, Social Determinants of Health, and Risk of All-Cause and Cardiovascular Mortality in the United States. *J racial Ethn Heal disparities*. 2024;11(2):853-864. doi:10.1007/s40615-023-01567-9
6. Ian Paterson D, Wiebe N, Cheung WY, et al. Incident Cardiovascular Disease Among Adults With Cancer: A Population-Based Cohort Study. *JACC CardioOncology*. 2022;4(1):85-94. doi:10.1016/j.jaccao.2022.01.100
7. Chan JSK, Satti DI, Dee EC, et al. Association between psychological distress and cardiovascular health amongst cancer survivors in the United States: findings from nationally representative data. *Eur J Prev Cardiol*. 2023;30(16):e74-e77.

doi:10.1093/eurjpc/zwad162

8. Blewett LA, Rivera Drew JA, King ML, Williams KCW, Del Ponte N, Convey P. IPUMS Health Surveys: National Health Interview Survey, Version 7.2. 2022.
9. Maqsood MH, Nguyen R, Chang R, et al. Unfavorable social determinants of health and mortality risk by cardiovascular disease status: Findings from a National Study of United States Adults. *Am Heart J*. 2024;267:95-100.  
doi:<https://doi.org/10.1016/j.ahj.2023.10.006>
10. Feliciano EJG, Ho FD V, Yee K, et al. Cancer disparities in Southeast Asia: intersectionality and a call to action. *Lancet Reg Heal – West Pacific*. 2023;41.  
doi:10.1016/j.lanwpc.2023.100971



## Figure legend

**Figure 1.** Kaplan-Meier cumulative incidence curves of all-cause (**A, E**), cardiovascular (**B, F**), cancer (**C, G**), and other-cause (**D, H**) mortality in cancer survivors (**A-D**, respectively) and individuals without cancer (**E-H**, respectively). All summary statistics presented were adjusted hazard ratios (aHR) with 95% confidence intervals. Model 1 was adjusted for age, race, and sex. Model 2 was adjusted for age, race, sex, hypertension, diabetes mellitus, dyslipidaemia, active smoking, weekly number of alcoholic drinks, cardiac condition(s), chronic obstructive pulmonary disease or emphysema, liver disease, stroke, obesity, and weekly exercise duration.

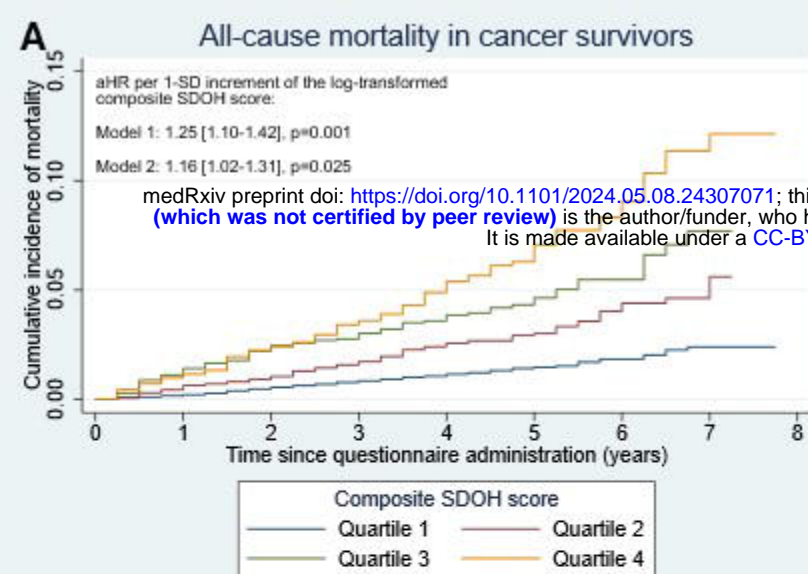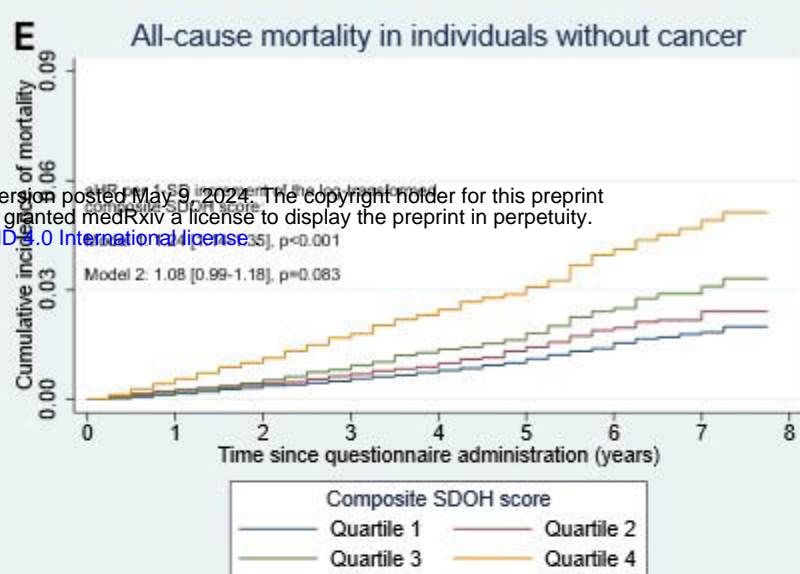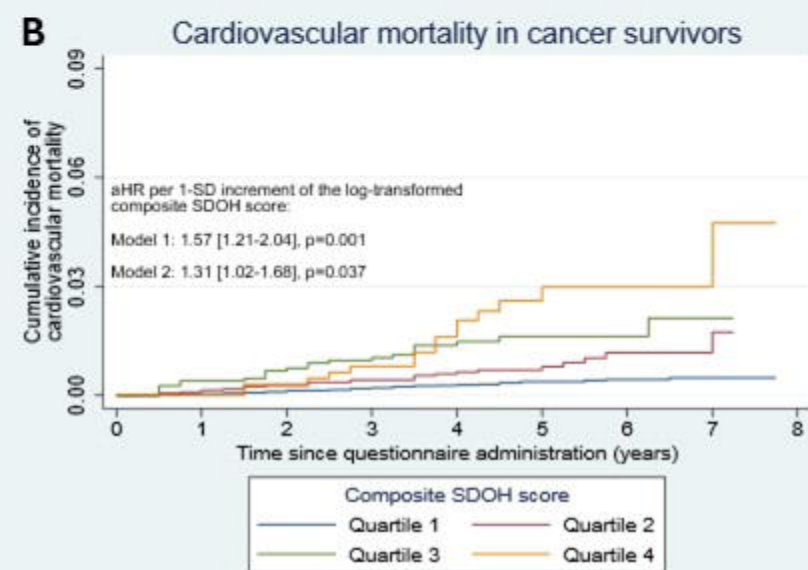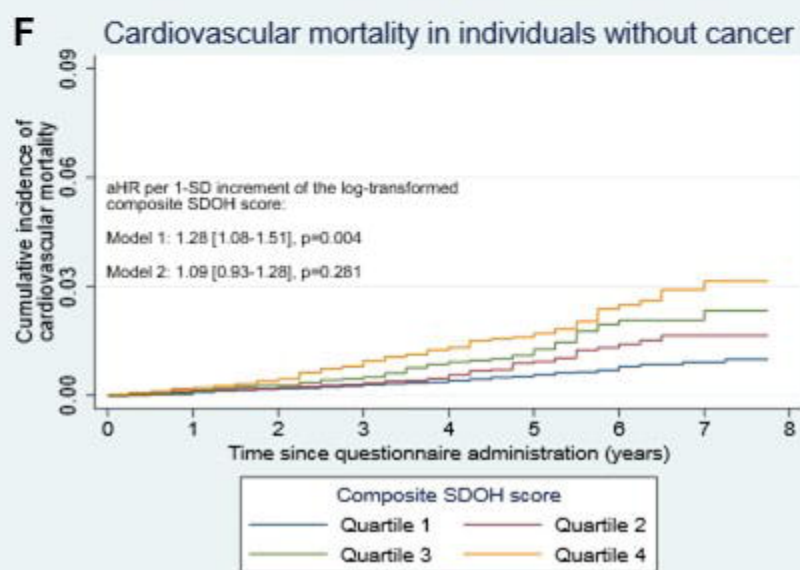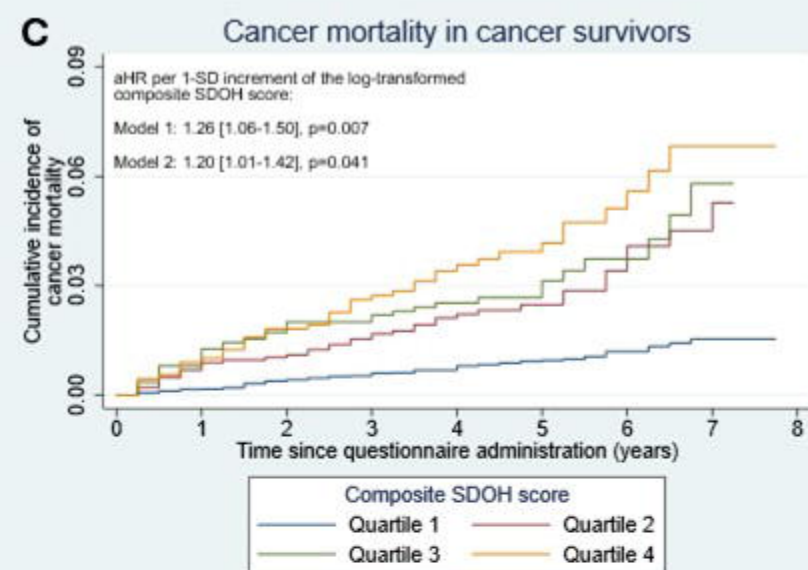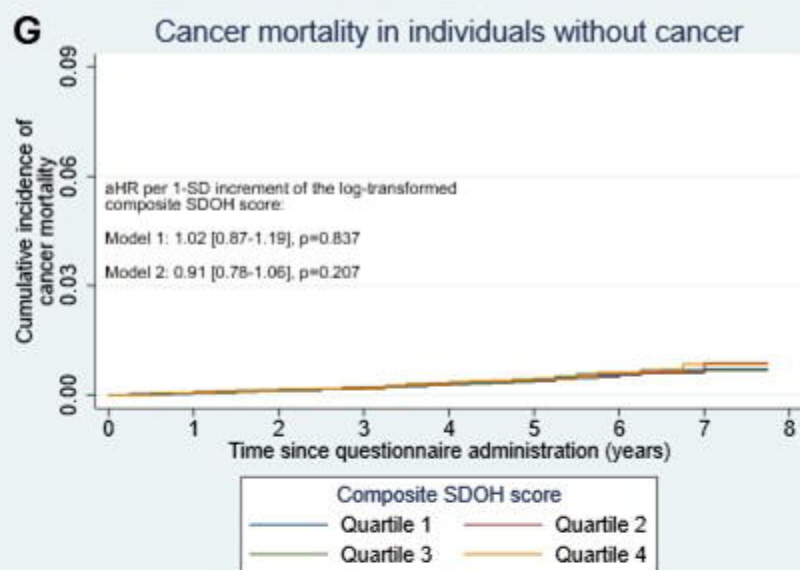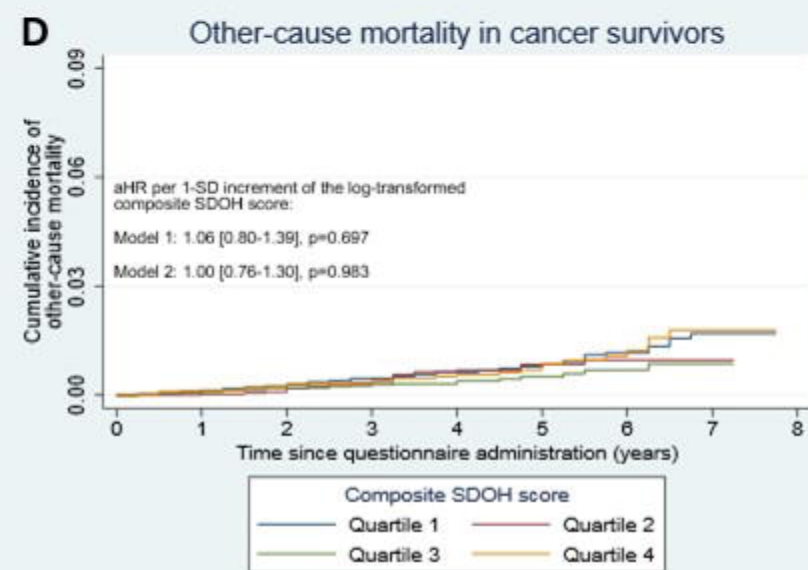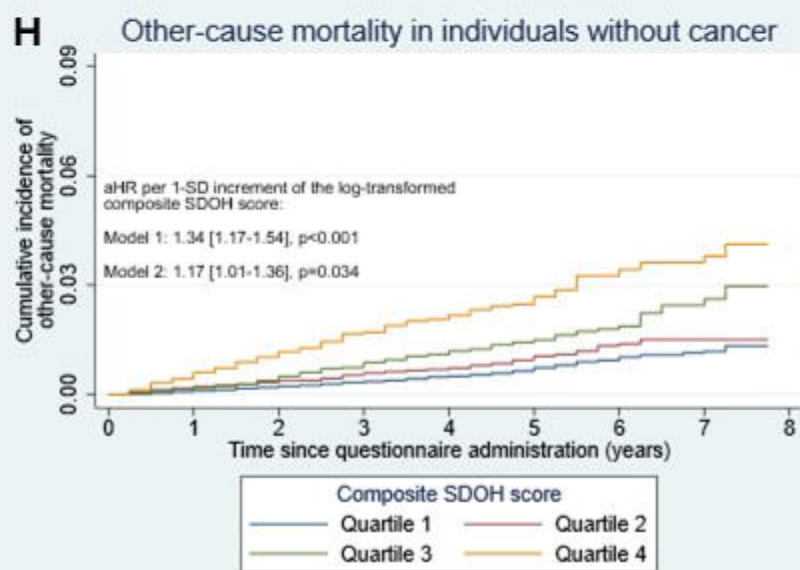

Source: https://medrxiv.org/content/10.1101/2024.05.08.24307071.full.pdf
